# Supplementary material for: Facile light exposure of zinc oxide via interfacial engineering for boosting responsivity and detectivity in organic photodetectors
Source: Royal Society of Chemistry journal article supplement (doi:10.1039/d3qi00127j), 2023-01-01
Supplement: d3qi00127j1.pdf [file d3qi00127j1.pdf]

Supporting Information

## **Facile light exposure of zinc oxide via interfacial engineering for boosting responsivity and detectivity in organic photodetectors**

*Jihyun Lim, Woongsik Jang, Junmin Lee, Ji Yun Chun, and Dong Hwan Wang\**

School of Integrative Engineering, Chung-Ang University, 84 Heukseok-Ro, Dongjak-gu, Seoul, 06974, Republic of Korea.

---

\* Corresponding author, E-mail address:

king0401@cau.ac.kr (Prof. D.H. Wang)

**Keywords:** Zinc oxide, light exposure treatment, defect passivation, work function, dark current density organic photodetector

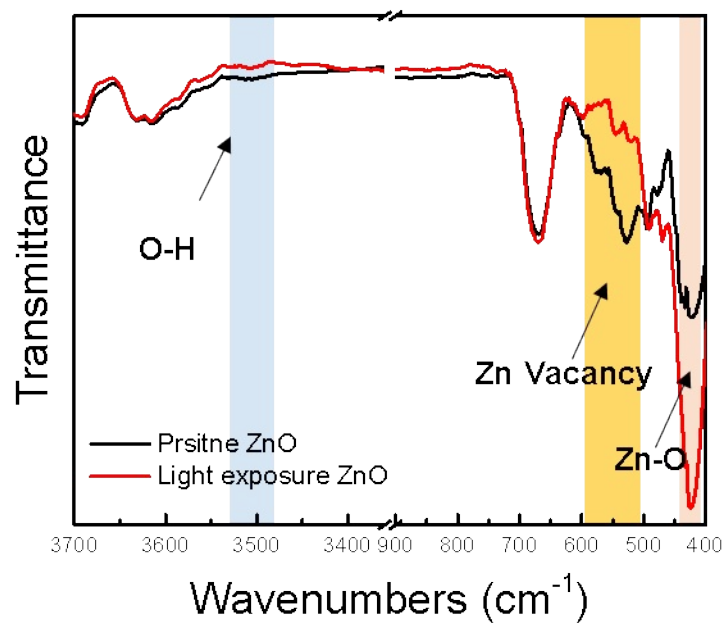

**Fig. S1.** FT-IR spectra of pristine ZnO film and light-exposed ZnO film

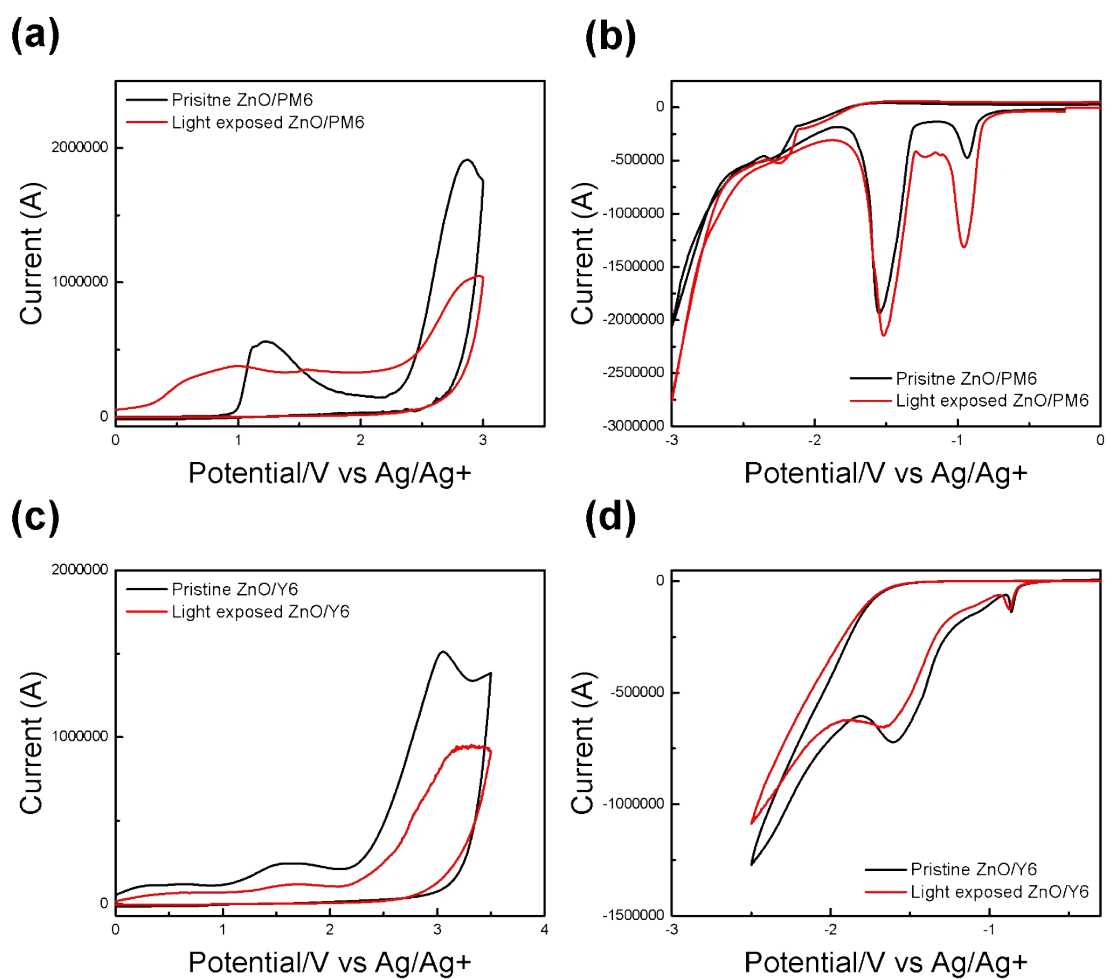

**Fig. S2.** CV analysis of ZnO and active materials (PM6, Y6) (a) oxidation potential range of ZnO/PM6, (b) reduction potential range of ZnO/PM6, (c) oxidation potential range of ZnO/Y6, (d) reduction potential range of ZnO/Y6

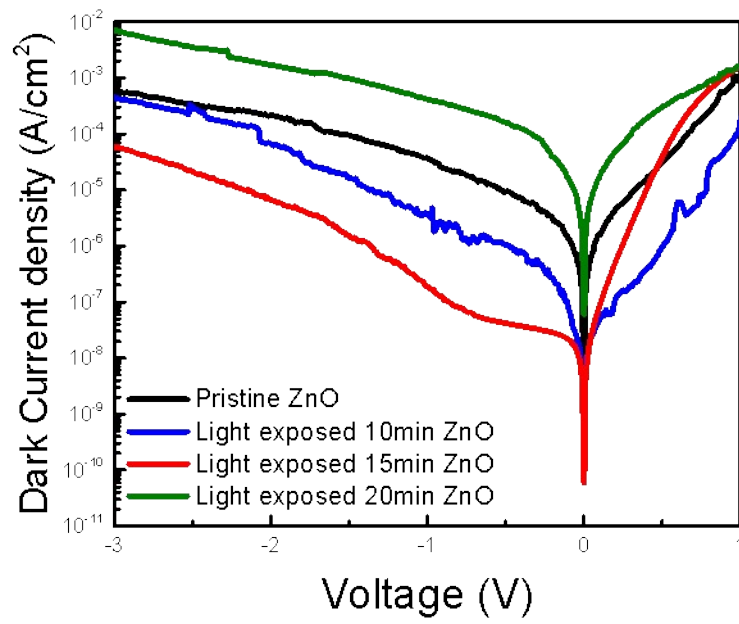

**Fig. S3.** Dark current density of organic photodetector according to ZnO light exposure treatment time (10, 15, 20 min).

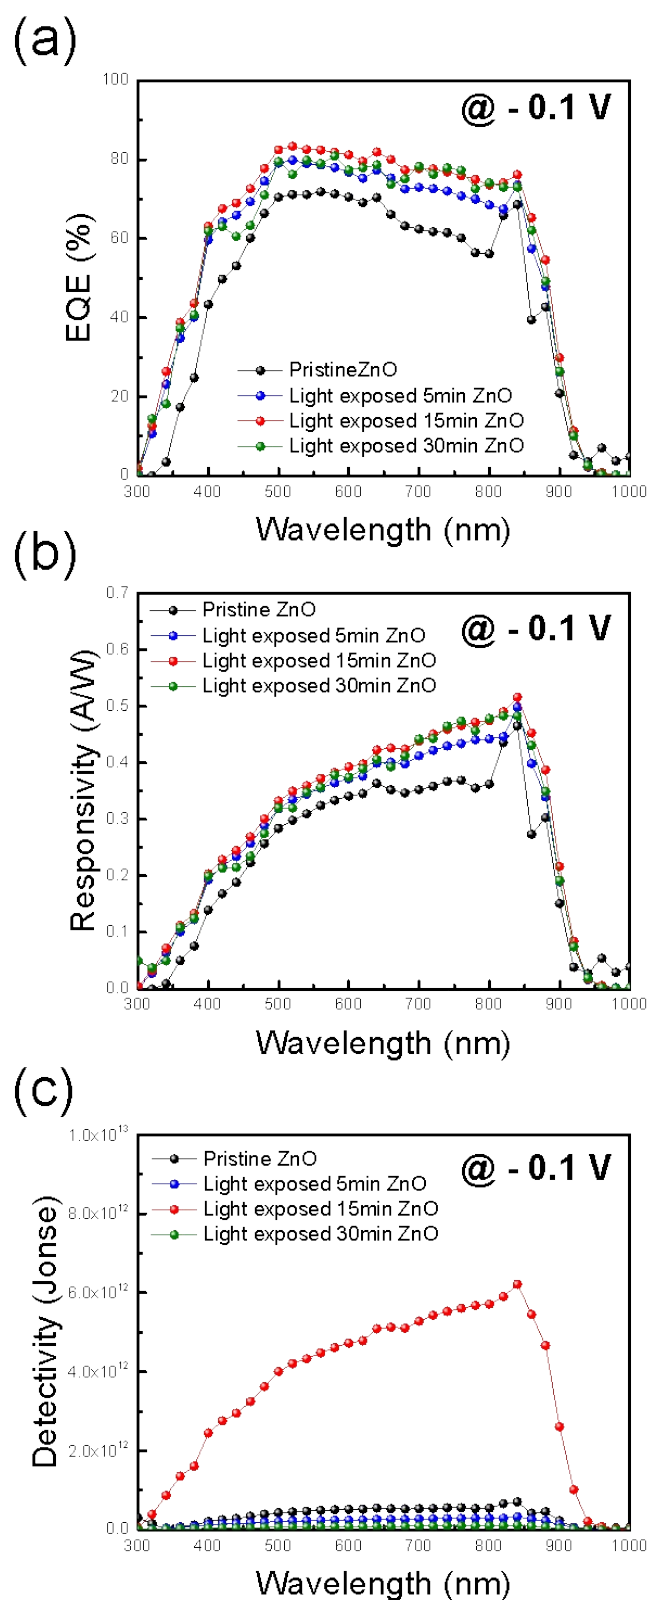

**Fig. S4.** (a) External quantum efficiency (EQE) analysis (b) responsivity at -0.1 V, (c) detectivity at -0.1 V of organic photodetector according to light exposure treatment time of ZnO layer (5, 15, 30 min)

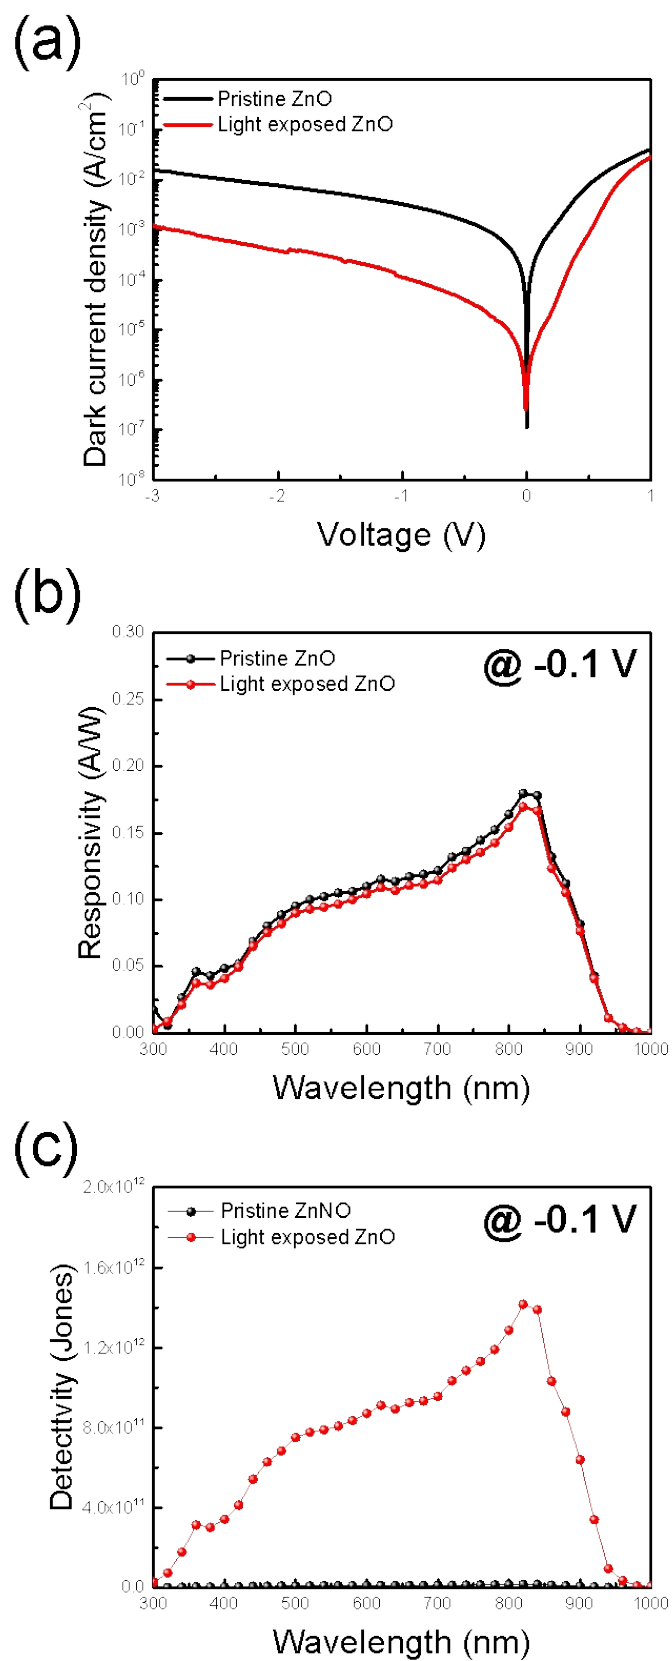

**Fig. S5.** (a) Dark current density, (b) responsivity at -0.1 V (C) detectivity at -0.1 V of ZnO-based organic photodetector after light exposure on whole device (15 min)

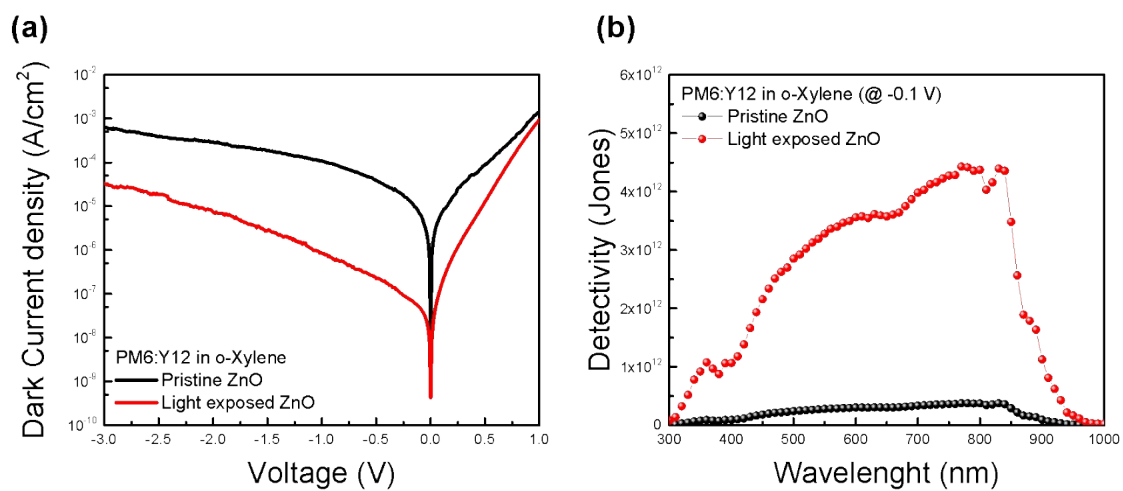

**Fig. S6.** (a) Dark current density, (b) detectivity at -0.1 V of PM6:Y12-based organic photodetector according to ZnO with light exposure treatment.

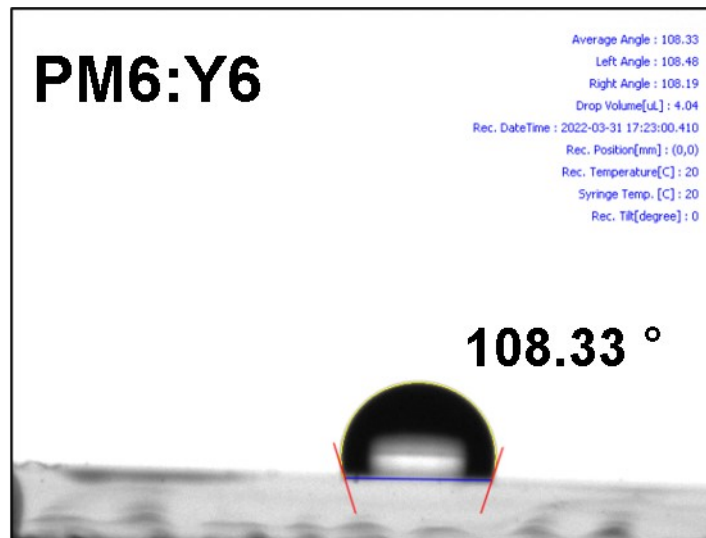

**Fig. S7.** Contact angle with DI water of PM6:Y6 film.



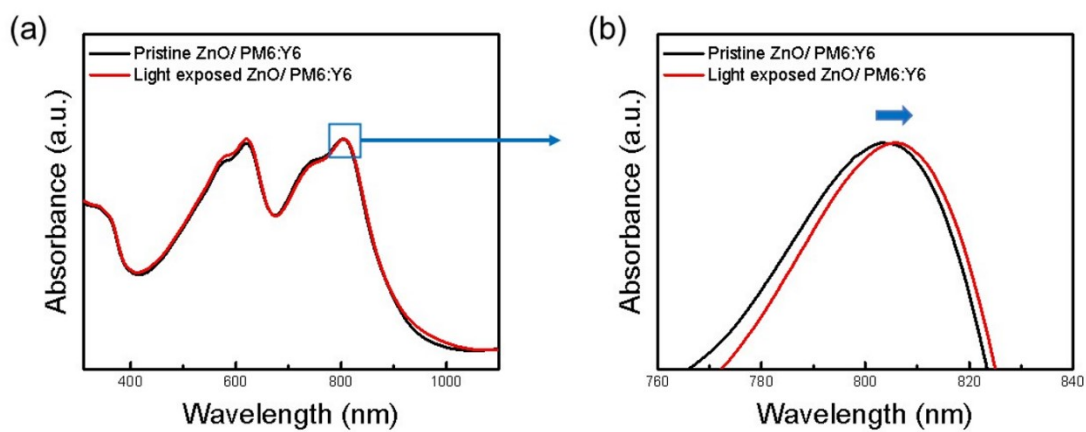

**Fig. S8.** UV–visible absorbance spectra of (a) pristine and light-exposed ZnO/PM6:Y6 films, (b) enlarged graph for redshift observation

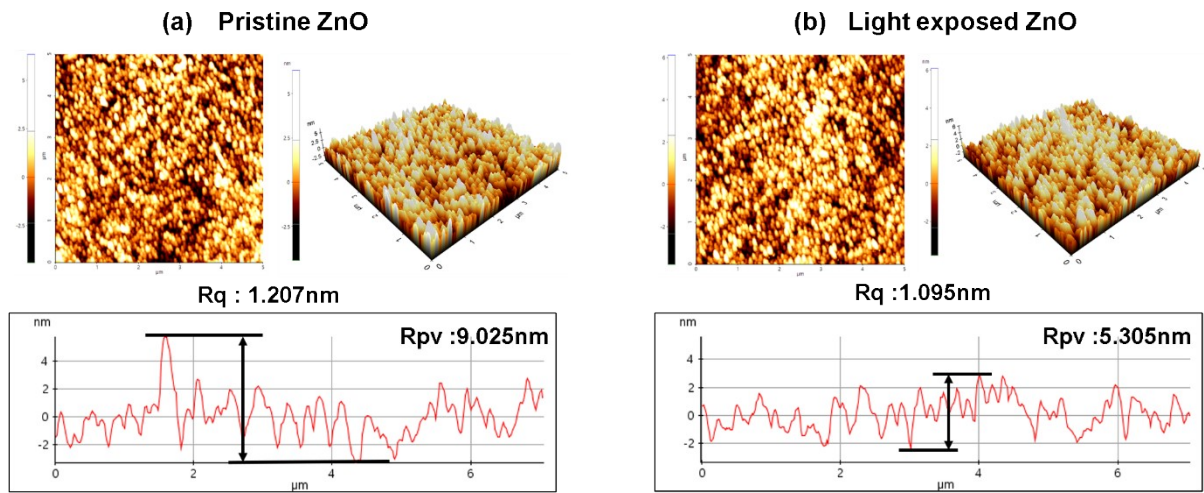

**Fig. S9.** 3D and 2D height AFM images of ZnO and ZnO/PM6:Y6 with light exposure treatment (a) ZnO pristine film, (b) ZnO film with light exposure treatment (15 min).

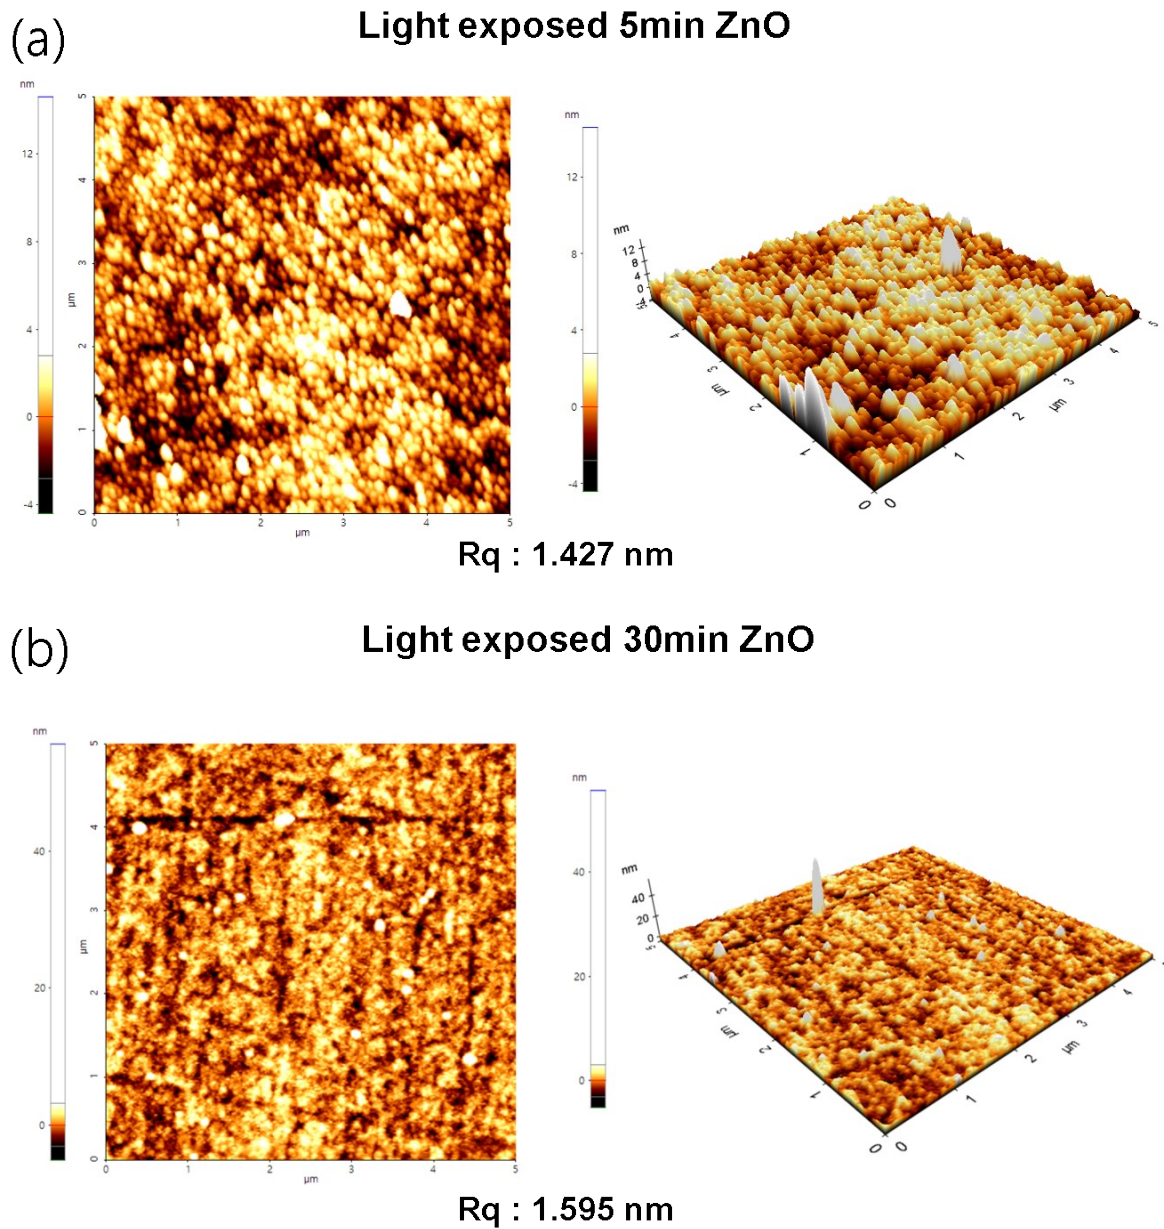

**Fig. S10.** The 2D and 3D height AFM images of ZnO film with light exposure treatment (a) 5min, (b) 30min.

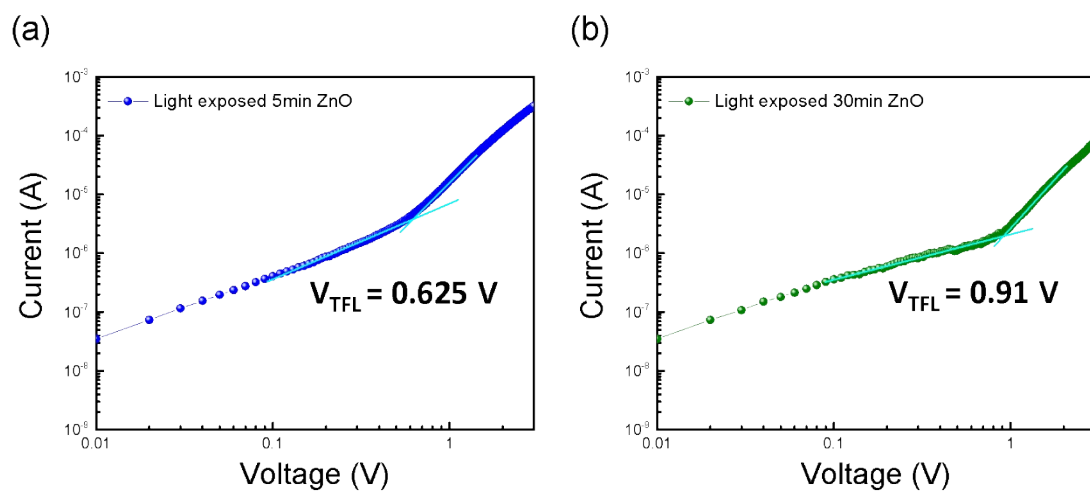

**Fig. S11.** Trap density analysis of ZnO with light exposure treatment (a) 5min, (b) 30min.

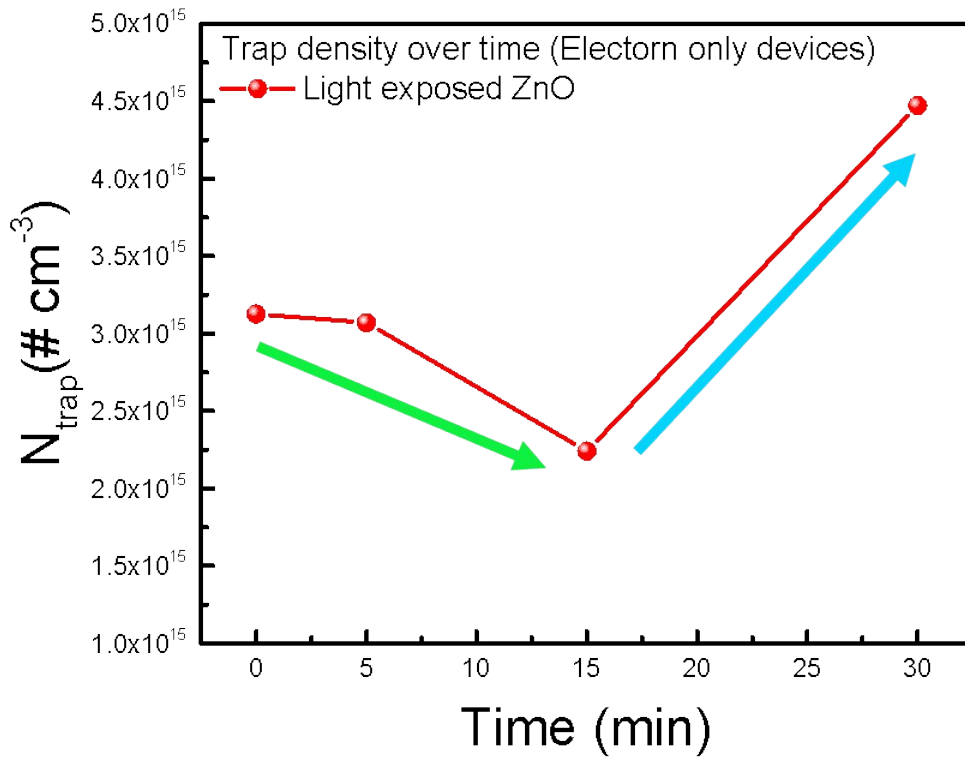

**Fig. S12.** Trap density change value according to ZnO light exposure treatment time.

**Table S1.** Contact angle and surface energy analysis of ZnO films with DI water and DIM.

|                          | <b>Energy</b> | <b>Dispersive</b> | <b>Polar</b> |
|--------------------------|---------------|-------------------|--------------|
| <b>Pristine ZnO</b>      | 59.17         | 37.43             | 21.74        |
| <b>Light-exposed ZnO</b> | 54.44         | 37.59             | 16.86        |

**Table S2.** Trap Density calculations for pristine ZnO and light exposure treatment ZnO-based devices.

|                         | $V_{TFL}$<br>V | $N_{trap}$<br># cm <sup>-3</sup> |
|-------------------------|----------------|----------------------------------|
| Pristine ZnO            | 0.637          | $3.127 \times 10^{15}$           |
| Light exposed 5min ZnO  | 0.625          | $3.071 \times 10^{15}$           |
| Light-exposed 15min ZnO | 0.456          | $2.241 \times 10^{15}$           |
| Light exposed 30min ZnO | 0.910          | $4.471 \times 10^{15}$           |

**Table S3.** Photoresponse rate of ZnO light exposure treatment-based inverted organic device (on/off ratio at 0.1–0.9 photocurrent)

|                          | <b>Light on (us)</b> | <b>Light off (us)</b> |
|--------------------------|----------------------|-----------------------|
| <b>Pristine ZnO</b>      | 1.76                 | 5.92                  |
| <b>Light-exposed ZnO</b> | 0.88                 | 3.44                  |
